# Supplementary material for: miR-200 family promotes podocyte differentiation through repression of RSAD2
Source: PubMed Central journal article supplement (PMC4890021; doi:10.1038/srep27105), 2016-06-02
Supplement: srep27105-s1.pdf [file srep27105-s1.pdf]

## miR-200 family promotes podocyte differentiation through repression of RSAD2

Li Zhigui, Yin Hongqiang, Hao Shuang, Wang Lifeng, Gao Jing, Tan Xiaoyue, Yang

Zhuo\*

College of Medicine, State Key Laboratory of Medicinal Chemical Biology, Tianjin  
Key Laboratory of Animal Models and Degenerative Neurological Diseases, Nankai  
University, Tianjin300071, China

\*Correspondence for Proofs:

Professor Yang Zhuo, College of Medicine, Nankai University, Tianjin, 300071,

China. Tel: 86-22-23504364. Fax: 86-22-23502554. E-mail:

[zhuoyang@nankai.edu.cn](mailto:zhuoyang@nankai.edu.cn)

Table S1 Oligonucleotides used in qPCR and cloning studies

| Primer Name          | Sequence (5'to 3')                 |
|----------------------|------------------------------------|
| <b>qPCR</b>          |                                    |
| RSAD2 forward        | CCGCTCGAGATGGGGATGCTGGTGCC         |
| RSAD2 reverse        | CGGGATCCTCACCAGTCCAGCTTCAGGT       |
| miR-200a             | TAACACTGTCTGGTAACGATGT             |
| miR-200b             | TAATACTGCCTGGTAATGATGA             |
| miR-429              | TAATACTGTCTGGTAATGCCGT             |
| miR-200c             | TAATACTGCCGGTAATGATGGA             |
| miR-141              | TAACACTGTCTGGTAAAGATGG             |
| GAPDH forward        | AGGTCGGTGTGAACGGATTTG              |
| GAPDH reverse        | TGTAGACCATGTAGTTGAGGTCA            |
| <b>RSAD2 3'UTR</b>   |                                    |
| RSAD2 forward        | ACCTCTGCCCTAACCTCACCTC             |
| RSAD2 reverse        | GTTACCATACATTAGAGCGATGC            |
| <b>RSAD2 3'UTR</b>   |                                    |
| <b>mutagenesis</b>   |                                    |
| RSAD2 forward        | CATTGGTTACATTTTTGACAGGAAATCTGGGTGC |
| RSAD2 reverse        | GTAACCAATGTAAAACTGTCCTTTAGACCCACG  |
| <b>RSAD2 cloning</b> |                                    |
| RSAD2 forward        | CCGCTCGAGATGGGGATGCTGGTGCC         |
| RSAD2 reverse        | CGGGATCCTCACCAGTCCAGCTTCAGGT       |

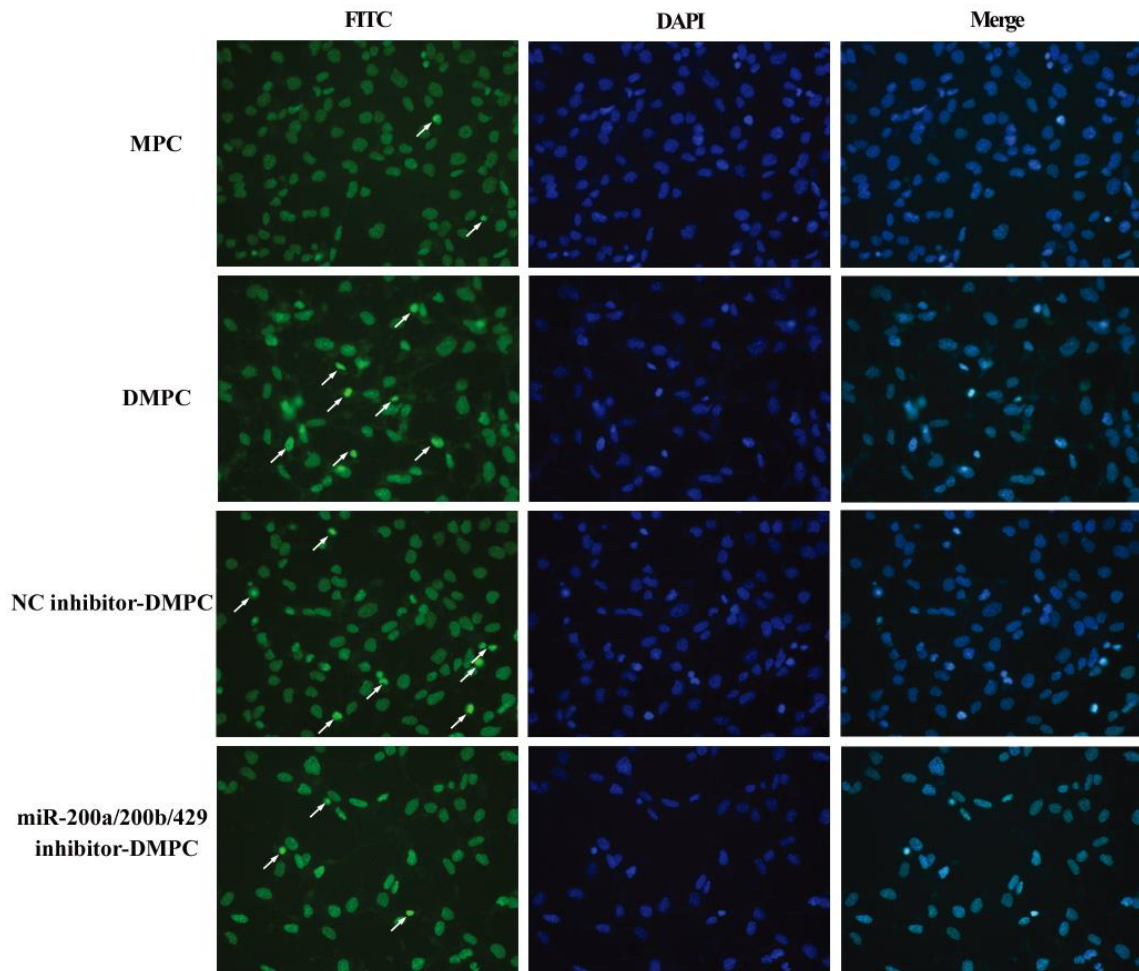

**Fig. S1** The morphological validation of cell apoptosis by TUNEL assay. Apoptotic cell DNA were labeled with FITC (green). Podocyte nuclei were also stained with DAPI (blue).

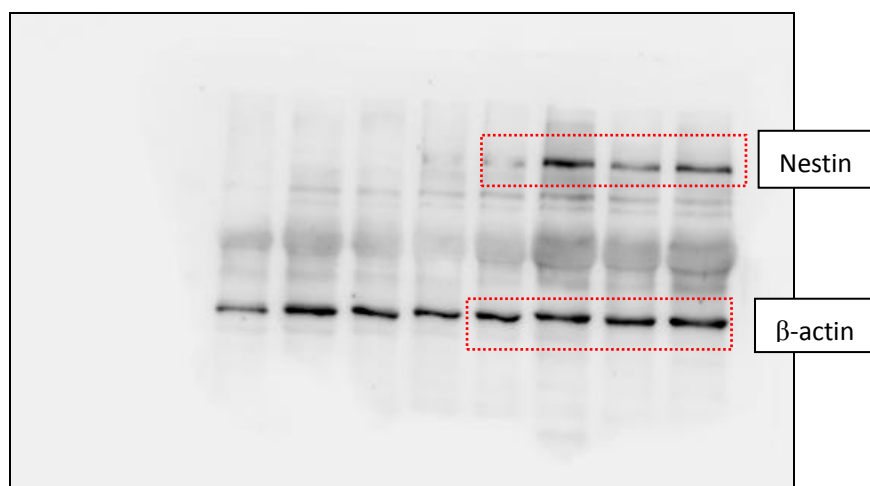

**Fig. S2** The corresponding full-length blot of Nestin and  $\beta$ -actin was shown above.

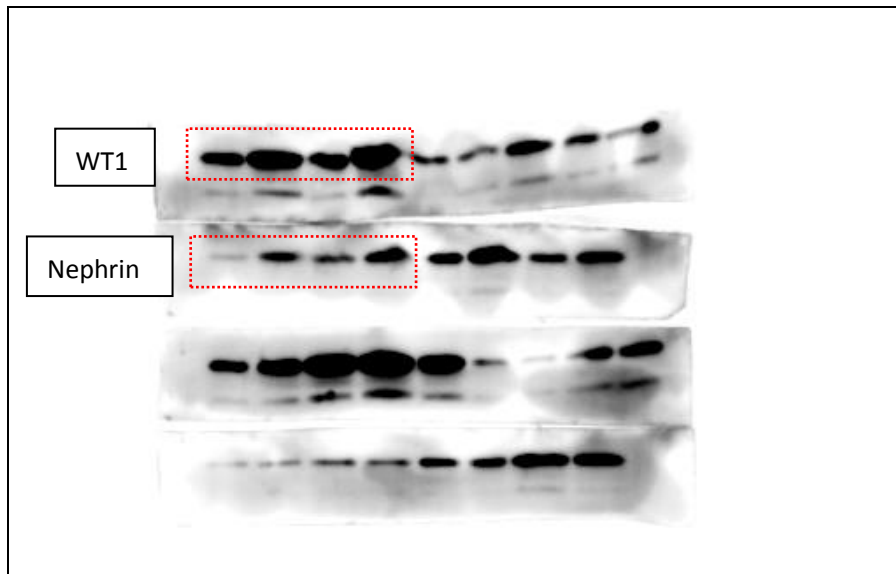

**Fig. S3** The corresponding full-length blot of WT1 and Nephrin was shown above.

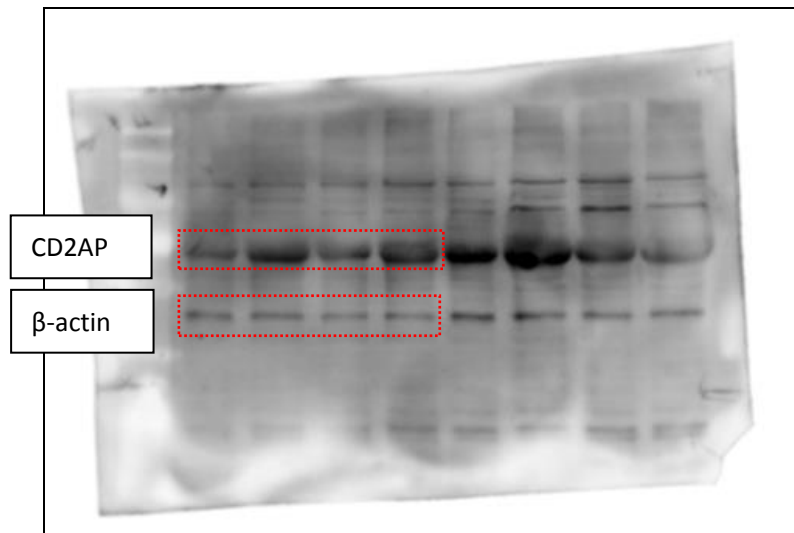

**Fig. S4** The corresponding full-length blot of CD2AP was shown above.

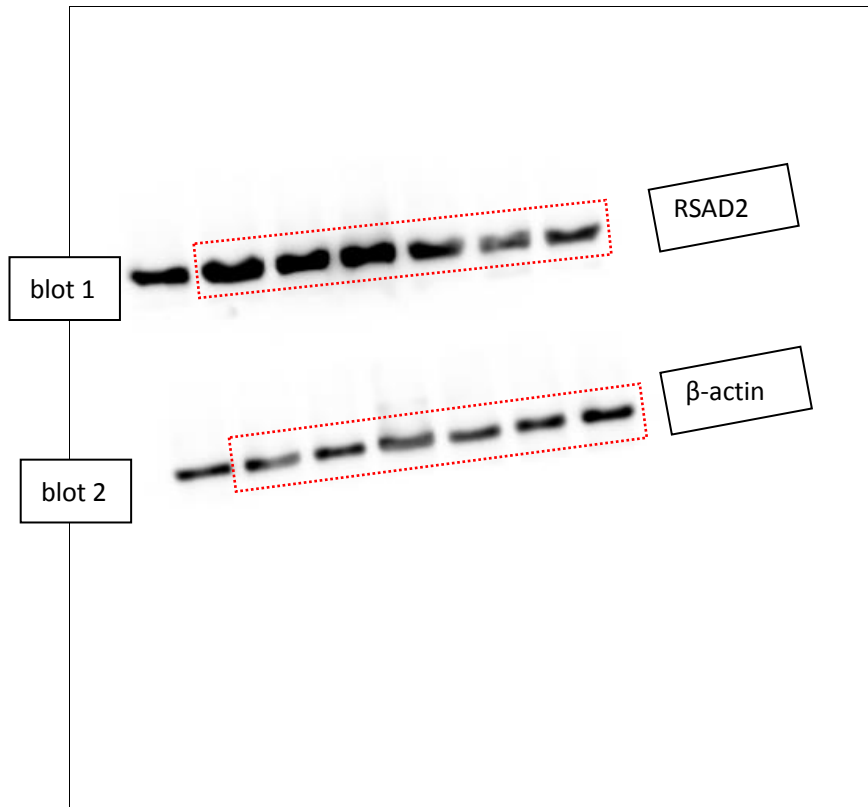

**Fig. S5** The corresponding full-length blot of RSAD2 and  $\beta$ -actin was shown above.

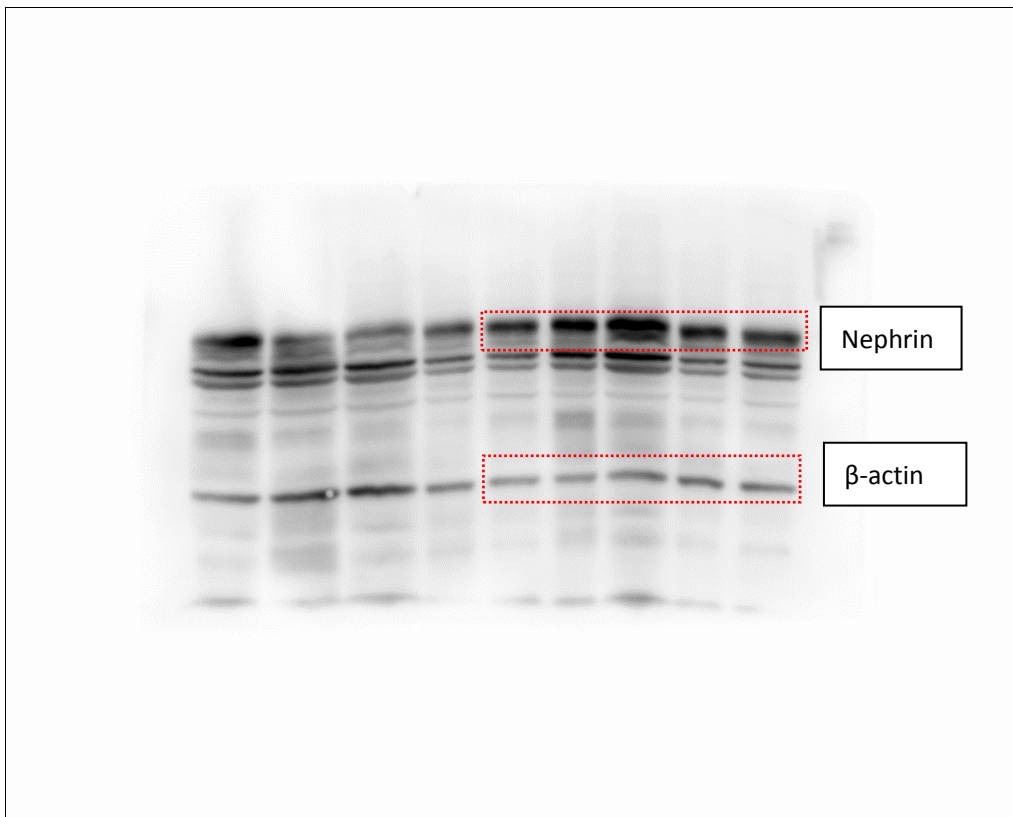

**Fig. S6** The corresponding full-length blot of Nephrin and  $\beta$ -actin was shown above.

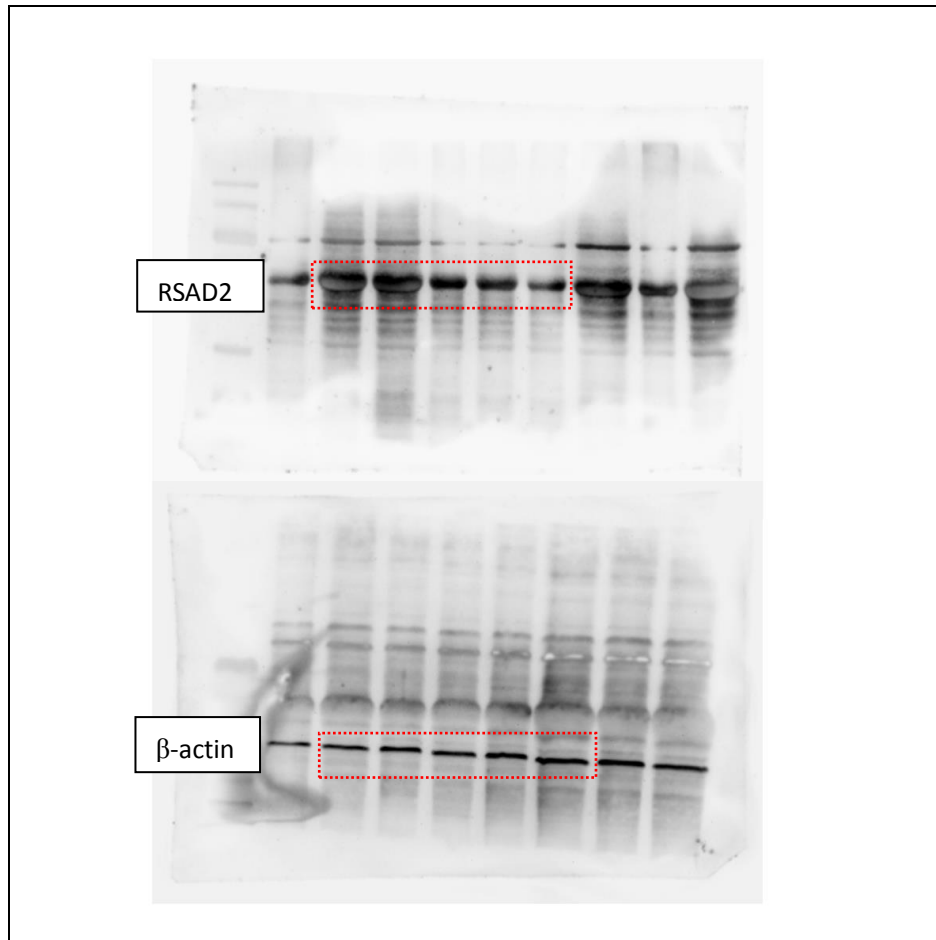

**Fig. S7** The corresponding full-length blot of RSAD2 and  $\beta$ -actin was shown above.
